# Supplementary material for: Trajectories of Homeless Shelter Utilization in the At Home/Chez Soi Trial of Housing First
Source: Atypon-hosted journal article supplement (doi:10.1176/appi.ps.201900260), 2020-04-08
Supplement: appi.ps.201900260.ds001.pdf [file appi.ps.201900260.ds001.pdf]

**eFigure 1: Flow diagram of participants included for analysis**

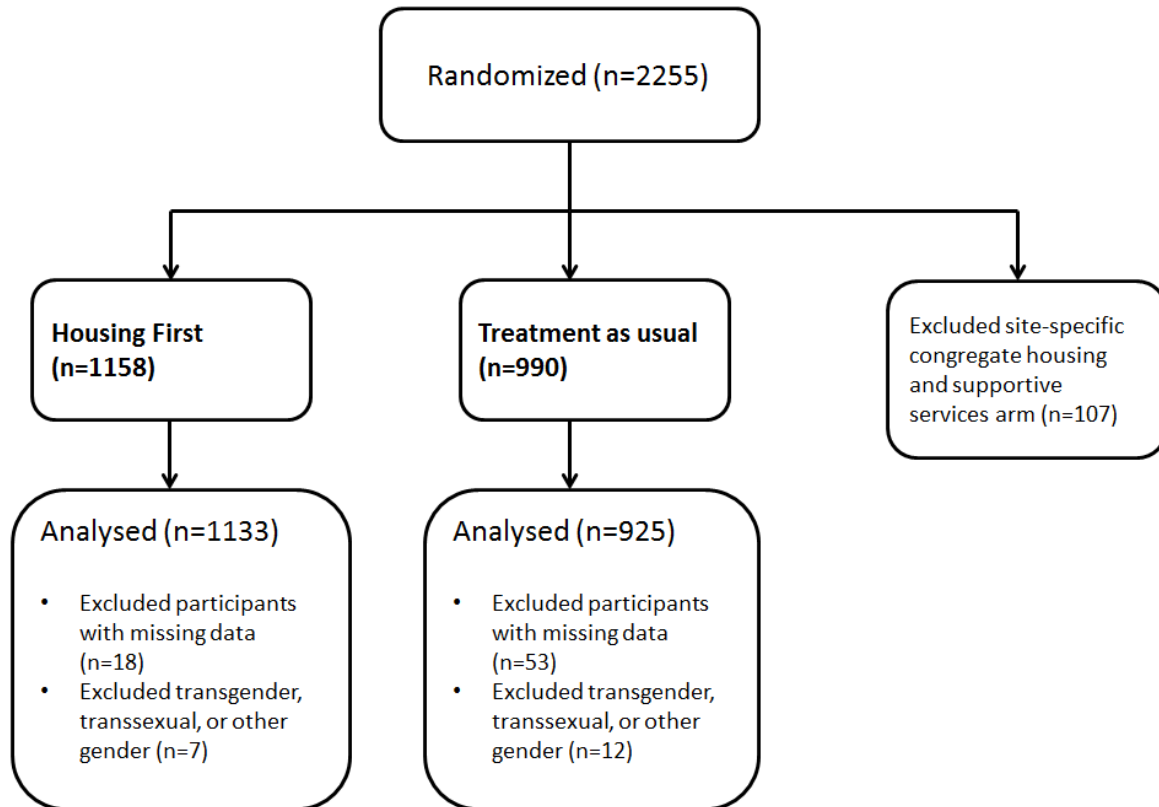

**eTable 1: Comparison of characteristics in the analyzed vs original sample**

| Variable                                         | Analyzed sample<br>N=2058 |      | Original sample<br>N=2255 |      |
|--------------------------------------------------|---------------------------|------|---------------------------|------|
|                                                  | N                         | %    | N                         | %    |
| Treatment group                                  |                           |      |                           |      |
| <i>Treatment as usual</i>                        | 925                       | 44.9 | 990                       | 43.9 |
| <i>Housing First</i>                             | 1133                      | 55.1 | 1265                      | 56.1 |
| Age (years)                                      | 40.9                      | -    | 40.9                      | -    |
| Gender (female)                                  | 663                       | 32.2 | 710                       | 31.5 |
| Ethnicity                                        |                           |      |                           |      |
| <i>Indigenous or other minority</i>              | 1046                      | 50.8 | 1140                      | 50.6 |
| Education (%)                                    |                           |      |                           |      |
| <i>Completed high school or higher education</i> | 904                       | 43.9 | 988                       | 43.8 |
| Income (\$/prior month)                          | 680.6                     | -    | 688.9                     | -    |
| Alcohol abuse or dependence                      | 920                       | 44.7 | 992                       | 44.0 |
| Drug abuse or dependence                         | 1089                      | 52.9 | 1199                      | 53.2 |
| Past psychiatric hospitalization                 | 780                       | 38.8 | 895                       | 39.7 |
| Past criminal involvement                        | 724                       | 35.4 | 820                       | 36.4 |
| Total time homeless (years)                      | 58.2                      | -    | 58.2                      | -    |
| Childhood trauma (ACE score)                     | 4.5                       | -    | 4.4                       | -    |
| Suicide risk                                     |                           |      |                           |      |
| <i>Moderate/high</i>                             | 745                       | 36.2 | 814                       | 36.1 |
| Baseline psychiatric diagnosis                   |                           |      |                           |      |
| <i>Severe</i>                                    | 959                       | 46.9 | 1096                      | 48.6 |
| Inadequate access to health care                 | 950                       | 46.7 | 1037                      | 46.0 |
| Level of functioning (MCAS score)                | 60.2                      | -    | 59.6                      | -    |
| Family social support (QOLI-20 Family score)     | 13.8                      | -    | 13.8                      | -    |
| Number of comorbidities                          | 4.8                       | -    | 4.7                       | -    |
| Site                                             |                           |      |                           |      |
| <i>Moncton</i>                                   | 195                       | 9.5  | 201                       | 8.9  |
| <i>Montreal</i>                                  | 463                       | 22.5 | 469                       | 20.8 |
| <i>Toronto</i>                                   | 530                       | 25.8 | 575                       | 25.5 |
| <i>Vancouver</i>                                 | 378                       | 18.4 | 513                       | 22.7 |
| <i>Winnipeg</i>                                  | 492                       | 23.9 | 497                       | 22.0 |

**eTable 2: Model selection indicators**

|                | <b>Quadratic, 4-class</b> | <b>Cubic, 4-class</b> |
|----------------|---------------------------|-----------------------|
| <b>BIC</b>     | 201746.052                | 200372.764            |
| <b>Entropy</b> | 0.992                     | 0.997                 |

*Note: Linear, quadratic, cubic, and piecewise models with 2-6 classes were investigated. However, due to unrealistic estimates or problems with convergence with the other attempted models, this table only lists the final two models used for consideration.*
